# Intracytoplasmic sperm injection is not superior to conventional IVF in couples with non-male factor infertility and preimplantation genetic testing for aneuploidies (PGT-A)

Neelke De Munck<sup>1,\*</sup>, Ibrahim El Khatib<sup>1</sup>, Andrea Abdala<sup>1</sup>,  
Ahmed El-Damen<sup>1</sup>, Aşina Bayram<sup>1</sup>, Ana Arnanz<sup>1</sup>, Laura Melado<sup>1</sup>,  
Barbara Lawrenz<sup>1,2</sup>, and Human M. Fatemi<sup>1</sup>

<sup>1</sup>IVIRMA Middle East Fertility Clinic, IVF laboratory, Abu Dhabi, United Arab Emirates <sup>2</sup>Obstetrical Department, Women's University Hospital Tuebingen, Tuebingen, Germany

\*Correspondence address. Marina Village, Villa B22/23, Abu Dhabi, United Arab Emirates. E-mail: Neelke.DeMunck@ivirma.com

Submitted on September 15, 2019; resubmitted on December 25, 2019; editorial decision on January 9, 2020

**STUDY QUESTION:** Does the insemination method impact the euploidy outcome in couples with non-male factor infertility?

**SUMMARY ANSWER:** Conventional IVF can be applied in cycles with preimplantation genetic testing for aneuploidies (PGT-A), as both IVF and ICSI generate equal numbers of euploid blastocysts.

**WHAT IS KNOWN ALREADY:** Ever since its introduction, the popularity of ICSI has increased tremendously, even in couples with non-male factor infertility. The use of conventional IVF is a contraindication for couples undergoing PGT to ensure monospermic fertilisation and to eliminate potential paternal contamination from extraneous sperm attached to the zona pellucida. Despite this, it has recently been shown that sperm DNA fails to amplify under the conditions used for trophectoderm biopsy samples.

**STUDY DESIGN, SIZE, DURATION:** This single-centre prospective pilot study included 30 couples between November 2018 and April 2019.

**PARTICIPANTS/MATERIALS, SETTING, METHOD:** Arab couples, with a female age between 18–40 years, body mass index  $\leq 30$  kg/m<sup>2</sup>, at least 10 cumulus oocyte complexes (COCs) following oocyte retrieval (OR) and normal semen concentration and motility (WHO) in the fresh ejaculate on the day of OR, were eligible for the study. Half of the sibling oocytes were assigned to conventional IVF, and the other half were assigned to ICSI. All embryos were cultured in a time-lapse imaging system in Global Total LP media. Blastocysts were subjected to trophectoderm biopsy on Day 5, 6 or 7 and next-generation sequencing (NGS) to determine blastocyst ploidy status. The primary objective was to determine the euploid rate in blastocysts from sibling oocytes.

**MAIN RESULTS AND THE ROLE OF CHANCE:** A total of 568 COCs were randomly allocated between IVF ( $n = 283$ ;  $9.4 \pm 4.0$ ) and ICSI ( $n = 285$ ;  $9.5 \pm 4.1$ ). While the incidence of normal fertilisation per cycle ( $6.1 \pm 3.8$  (64.0%) vs  $6.3 \pm 3.5$  (65.4%);  $P = 0.609$ ) was distributed equally between IVF and ICSI, the degeneration rate ( $0.1 \pm 0.3$  vs  $0.7 \pm 0.8$ ;  $P = 0.0003$ ) was significantly higher after ICSI and the incidence of abnormal fertilisation ( $\geq 3$  pronuclei) was significantly higher after IVF ( $0.9 \pm 1.2$  vs  $0.2 \pm 0.4$ ;  $P = 0.005$ ). For all fertilised oocytes, there were no differences in the number of good-quality embryos on Day 3 (74% vs 78%;  $P = 0.467$ ), nor in the blastulation rate on Day 5 (80.4% vs 70.8%;  $P = 0.076$ ). The total number of blastocysts biopsied per cycle on Days 5, 6 and 7 was not significantly different between IVF or ICSI ( $4.0 \pm 2.8$  vs  $3.9 \pm 2.5$ ;  $P = 0.774$ ). With euploid rates of 49.8 and 44.1% ( $P = 0.755$ ; OR: 1.05664 [0.75188–1.48494]), respectively, there was no significant difference identified between IVF and ICSI ( $2.0 \pm 1.8$  vs  $1.9 \pm 1.7$ ;  $P = 0.808$ ) and all couples had at least one euploid blastocyst available for transfer. When considering only euploid blastocysts, the male/female ratio was 61/39 in IVF and 43/57 in ICSI ( $P = 0.063$ ).

**LIMITATIONS, REASON FOR CAUTION:** This is a pilot study with a limited patient population of 30 couples (and 568 COCs) with a normal ovarian response. The results of our study should not be extrapolated to other patient populations.

**WIDER IMPLICATIONS OF THE FINDINGS:** It is safe to apply conventional IVF in couples with non-male factor infertility undergoing PGT-A.

**STUDY FUNDING/COMPETING INTEREST(S):** No funding was obtained. There are no competing interests.

**TRIAL REGISTRATION NUMBER:** NCT03708991.

**Key words:** IVF / ICSI / PGT-A / blastocyst / non-male factor

## Introduction

Conventional IVF was initially developed for the treatment of female infertility and did not overcome the challenges posed by male factor. While beneficial results can be obtained with high insemination concentrations (HIC) in mild-male factor infertility (Ord *et al.*, 1993; Oehningen *et al.*, 1996; Tournaye *et al.*, 2002), it was only with the introduction of intracytoplasmic sperm injection (ICSI) in 1992 that improved fertilisation outcomes were obtained in couples with male factor infertility (Palermo *et al.*, 1992). Despite the lack of scientific evidence proving benefit in the absence of male factor, the popularity of ICSI has increased exponentially worldwide, with many centres using ICSI almost exclusively as their insemination method (Kupka *et al.*, 2014; Boulet *et al.*, 2015; European IVF-Monitoring Consortium *et al.*, 2016; Chambers *et al.*, 2017). As such, ICSI is now widely used to treat poor ovarian responders, patients of advanced maternal age and patients with previous fertilisation failure with conventional IVF and even couples with unexplained infertility and mild- or non-male factor infertility.

In comparison to ICSI, conventional IVF facilitates a more 'natural' selection of biologically fit sperm. Various concerns have been raised, but not proven conclusively, regarding safety of the ICSI technique (Patrio, 1995; Bianchi *et al.*, 1996; Watanabe 2018): (i) the choice of sperm based solely on the embryologists' subjective opinion of sperm phenotypic traits with no knowledge of the sperm genetic quality; (ii) physical or biochemical disturbance of the ooplasm or the meiotic spindle; (iii) errors in the selection of the injection site by inaccurate positioning of the injection needle with respect to the meiotic spindle; (iv) injection of biochemical contaminants; and (v) injection of foreign sperm-associated exogenous DNA.

In non-male factor infertility, the use of ICSI has not been conclusively proven to be beneficial for fertilisation and embryo development, as the available literature can be conflicting (Aboulghar *et al.*, 1996; Staessen *et al.*, 1999; Bhattacharaya *et al.*, 2001; Van Landuyt *et al.*, 2005; Eftekhari *et al.*, 2012; Ming *et al.*, 2015; Grimstad *et al.*, 2016; Tannus *et al.*, 2017; Schwarze *et al.*, 2017; Sustar *et al.*, 2019; Farhi *et al.*, 2019). In the absence of conclusive evidence proving a benefit, ICSI is predominantly used to prevent a re-occurrence of total fertilisation failure after conventional IVF in couples with non-male factor infertility. However, equal or increased pregnancy and live birth rates have been ascribed to the use of conventional IVF (Bhattacharaya *et al.*, 2001; Check *et al.*, 2009 and 2011; Eftekhari *et al.*, 2012; Grimstad *et al.*, 2016; Schwarze *et al.*, 2017; Sustar *et al.*, 2019; Drakopoulos *et al.*, 2019). While conventional IVF seems the most appropriate insemination method in non-male factor infertility, the use of ICSI has been recommended by ASRM, SART and ESHRE/PGDIS for all couples pursuing preimplantation genetic testing (PGT), even for couples with non-male factor infertility. The motivation to choose ICSI over conventional IVF is to ensure monospermic fertilisation,

to eliminate potential paternal contamination from extraneous sperm attached to the zona pellucida or to prevent the presence of non-decondensed sperm within blastomeres or cumulus cells (Thornhill *et al.*, 2006; ESHRE Capri Workshop group, 2007, PGDIS meeting 2019, Harton *et al.*, 2011; ASRM, 2012; Berger and Baker, 2014). Despite this suggestion, it has recently been shown that sperm DNA fails to amplify under the conditions used for trophectoderm (TE) biopsy samples, opening doors to the use of conventional IVF in PGT cycles (Lynch *et al.*, 2019).

As a result, the use of conventional IVF has been explored in PGT cycles in recent years (Feldman *et al.*, 2017; Şahin *et al.*, 2018; Palmerola *et al.*, 2019). Similar euploidy rates were obtained for IVF and ICSI in PGT for monogenic disorders (PGT-M) on blastomeres (Feldman *et al.*, 2017), and after fluorescent *in situ* hybridisation (FISH) on blastomeres (Şahin *et al.*, 2018) as well as after PGT for aneuploidies (PGT-A) on TE biopsies (Palmerola *et al.*, 2019). However, the retrospective design of these studies and the very limited information available after TE biopsy highlight the need for more in-depth analysis on the use of conventional IVF in PGT-A cycles. Therefore, we performed a prospective pilot study to verify the effectiveness of conventional IVF and ICSI in PGT-A cycles with non-male factor infertility.

## Materials and Methods

Approval for this study was obtained from the Ethics Committee of IVIRMA Middle East Fertility Clinic, Abu Dhabi, UAE (United Arab Emirates) (Research Ethics Committee REFA024) and was registered at the ClinicalTrials.gov website ([www.clinicaltrials.gov](http://www.clinicaltrials.gov), trial number NCT03708991). A total of 42 couples signed the informed consent form, and 30 of these were randomised following oocyte retrieval (OR): five patients had <10 cumulus oocyte complexes (COCs) retrieved, six patients had insufficient sperm concentration and/or motility and one patient was recruited for a different study as she experienced an IVF failure.

## Study design

This prospective pilot study was performed at IVI RMA Middle East Fertility Clinic, Abu Dhabi, UAE, between November 2018 and April 2019. Couples had to fulfil the following inclusion criteria: female age between 18 and 40 years, body mass index (BMI)  $\leq 30$  kg/m<sup>2</sup>,  $\geq 10$  COCs after OR, all ovarian stimulation protocols, Arab population, PGT-A analysis and fresh ejaculates. Only ejaculates according to the World Health Organization (WHO, 2010) were eligible:  $<1 \times 10^6$ /ml round cells, concentration  $>15 \times 10^6$ /ml, total motility  $\geq 40\%$  and progressive motility  $\geq 32\%$ , with a progressive motility  $\geq 65\%$  after capacitation. As a preliminary semen analysis was not performed at the IVIRMA Fertility Clinic for all patients, normal morphology by strict Kruger criteria was not considered. If suboptimal sperm morphology

was noted on the day of OR, patients were excluded from randomisation. Every couple could only be recruited once for the study. If after the OR at least 10 COCs were obtained, low microscope magnification was used to allocate half of these COCs to one dish (Group I) and the other half of the COCs to another dish (Group II). Three hours after the OR, upon denudation, an electronically generated randomisation list was opened to verify the insemination method for Group I and naturally, Group II received the remaining insemination method.

The primary objective was to assess the euploid rate between IVF and ICSI blastocysts. Secondly, the fertilisation, preimplantation development and sex distribution were compared between IVF and ICSI. Fertilisation and abnormal fertilisation were calculated from the number of COCs assigned to a specific group. Embryo quality on Day 3 was calculated from the number of fertilised zygotes. Blastulation rate and blastocyst quality were calculated on the number of embryos undergoing extended culture to Day 5.

## Ovarian stimulation protocols

Ovarian stimulation was performed by standard gonadotropin-releasing hormone (GnRH)-antagonist protocols, using recFSH (recombinant follicle-stimulating hormone) or HMG (human menopausal gonadotropin) as stimulation medication. The stimulation medication dose was decided in accordance with ovarian reserve parameters (La Marca and Sunkara, 2014). Final oocyte maturation was achieved by administration of either 5000–10 000 IU of hCG, 0.3 mg of GnRH agonist (triptorelin) or dual trigger (hCG and GnRH-agonist), as soon as  $\geq 3$  follicles  $\geq 17$  mm were present. OR was carried out 36 h after the trigger for final oocyte maturation. All included patients had a systemic progesterone level on the day of final oocyte of less than 1.5 ng/ml. Oocytes were collected in Quinn's Advantage Medium with HEPES, (SAGE, Måløv, Denmark) supplemented with HSA (Vitrolife, Göteborg, Sweden) (HTF-HSA) and washed in Global Total LP medium for fertilisation after which they were cultured at 37°C, 6% CO<sub>2</sub> and 5% O<sub>2</sub> until denudation.

## Semen processing

Immediately after the OR, semen samples were obtained by masturbation, allowed to liquefy and prepared within 60 min. Semen was counted in a Makler chamber and processed (capacitated) on a discontinuous density gradient (90/45, Spermint, COOK), followed by centrifugation at 300g for 7–15 min. After centrifugation, the pellet was washed twice in HTF-HSA (750g, 5 min) and concentrated to a final concentration between 1 and  $5 \times 10^6$ /ml, counted in an improved Neubauer. The HTF-HSA-washed sperm sample was kept at room temperature until being used for ICSI, while the sperm for IVF underwent an additional wash with pre-equilibrated (37°C, 6% CO<sub>2</sub>) Global Total LP medium for fertilisation (CooperSurgical) (750g, 5 min) and were used immediately after preparation.

## Insemination and embryo culture

In the ICSI arm, COCs were denuded (Hyase, Vitrolife) 3 h after OR, and mature oocytes were injected 1 h later (Palermo *et al.*, 1992). After injection, oocytes were cultured in individual 25- $\mu$ L drops of Global Total medium (CooperSurgical) in the EmbryoScope time-lapse incubator (Vitrolife) at 37°C, 6% CO<sub>2</sub> and 5% O<sub>2</sub>. In the IVF arm,

10 000 progressive motile sperm were added to a 25- $\mu$ L fertilisation medium ( $\sim 0.3 \times 10^6$ /ml) and after pre-equilibration, a single COC was added per 25- $\mu$ L culture drop. Sperm-COCs were incubated overnight at 37°C, 6% CO<sub>2</sub> and 5% O<sub>2</sub> in G185 incubators (K-Systems), and cumulus cells were removed after 17–20 h, prior to the fertilisation check. Afterwards, IVF zygotes were transferred to Global Total medium and further culture was performed in the EmbryoScope time-lapse incubator. On Day 3 of development, the Global Total culture medium was refreshed by removing 20  $\mu$ L from each well and adding 20  $\mu$ L overnight-equilibrated Global Total medium. Embryos were cultured until blastocyst biopsy was performed on Days 5–7 of preimplantation development.

On Day 3 of development (68 h post insemination), all normally fertilised oocytes were scored for the number and symmetry of the blastomeres, fragmentation, presence of vacuoles, granulation and multinucleation. Based on these parameters, an embryo quality (EQ) score was assigned to each embryo: EQ1 (excellent), EQ2 (good), EQ3 (moderate) and EQ4 (poor), as previously described by De Munck *et al.* (2015) with a minor adaptation: embryos with  $>20\%$  fragmentation were included in EQ3 and not in EQ2. On Day 5 of development (116 h post insemination), blastulation rate was assessed by checking the capacitation to cavitate per embryo undergoing extended culture to Day 5. Blastocysts were scored according to the grading system developed by Gardner and Schoolcraft (1999) based on the expansion stage, the number of cells joining the compaction or blastulation and the appearance of the TE and inner cell mass (ICM). On Day 5 of development, as well as at the time of biopsy, blastocysts were graded and assigned to one of four EQ scores: EQ1 (excellent), EQ2 (good), EQ3 (moderate), EQ4 (poor), as previously described (De Munck *et al.*, 2015).

## Blastocyst biopsy

Blastocyst biopsy was performed in 10- $\mu$ L drops of HTF-HSA, the blastocyst was fixed with the holding and positioned with a clear view on the ICM at 12 o'clock and the zona pellucida was perforated by three to five laser pulses of 2.2 ms (OCTAX, Herborn, Germany) after which collapse of the blastocyst was induced. Five to 10 TE cells were aspirated in the biopsy pipet followed by three laser pulses to induce an initial cut of the TE cells inside the biopsy pipette and mechanical 'flicking' method to cut the TE cells inside the biopsy pipette; TE biopsies were washed, placed in 0.2-ml PCR tubes containing 2.5  $\mu$ L PBS and stored at  $-20^\circ\text{C}$  until further processing.

## Ploidy status of blastocysts by NGS

A whole genome amplification (WGA) protocol was performed on all individual samples (PicoPLEX technology by Rubicon Genomics, Inc; Ann Arbor, Michigan, USA). After WGA, library preparation consisted of the incorporation of individual barcodes for the amplified DNA of each embryo. After isothermal amplification and enrichment, sequencing was performed in a 316 or 318 chip using the Personal Genome Machine sequencing (Life-Thermo Fisher, USA). For sequencing analysis and data interpretation, Ion Reporter software was employed. Embryos were diagnosed as euploid or aneuploid. In case of a result indicating mosaicism, the embryo was classified as 'euploid' when the extent of mosaicism was below 30% and as 'aneuploid' when the

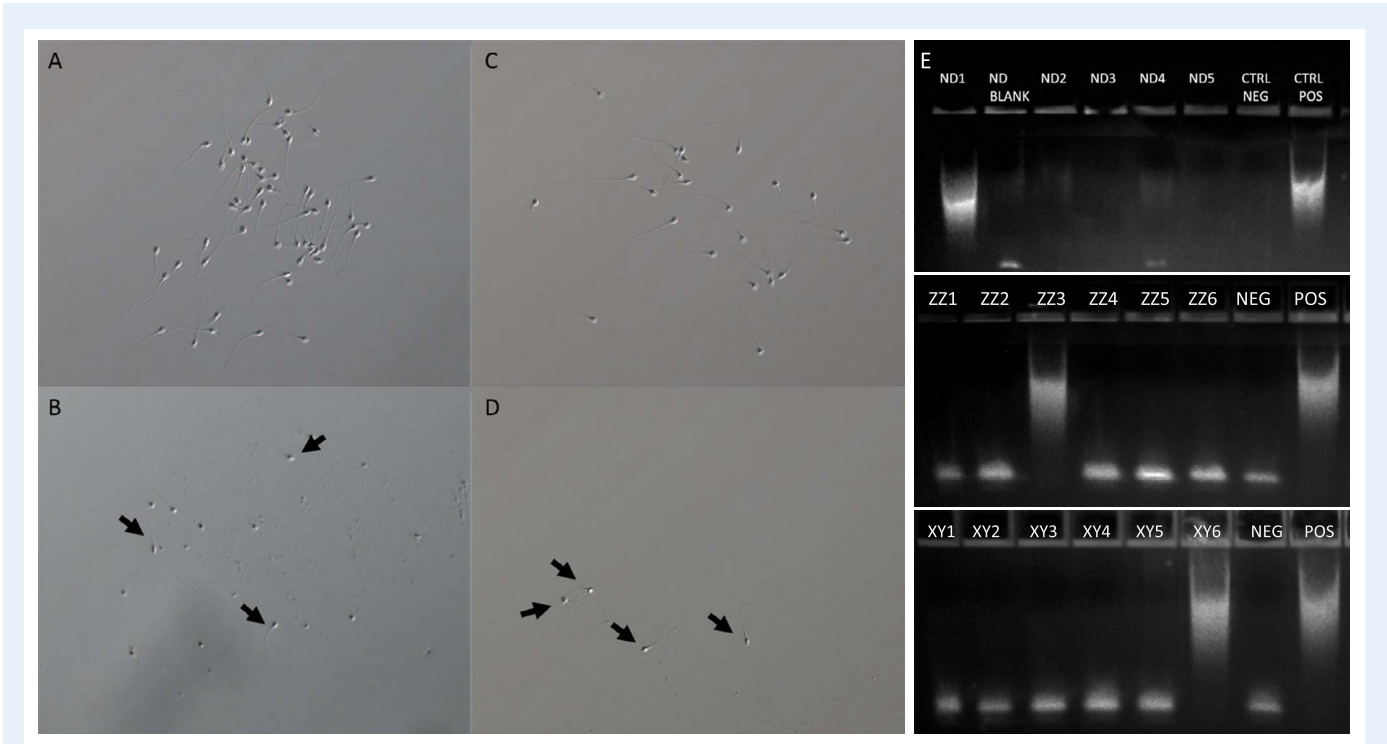

**Figure 1 Validation whole genome amplification of sperm.** **A:** sperm cells ( $n = 60$ ) selected for tubing; **B:** sperm cells left in the drop ( $n = 3$ ; arrow) after visual selection of the sperm under the microscope; **C:** sperm cells ( $n = 24$ ) selected for tubing; **D:** sperm cells left in the drop ( $n = 4$ ; arrow) after visual selection of the sperm under the microscope. **E:** WGA results from the three experiments (ND = Experiment 1, ZZ = Experiment 2, XY = Experiment 3); ND1: positive control, ND Blank: negative control, ND2: 60 sperm, ND3: 25 sperm, ND4: 60 sperm, ND5: 25 sperm; ZZ1: 20 sperm, ZZ2: 20 sperm, ZZ3: positive control, ZZ4: negative control, ZZ5: 3 sperm, ZZ6: 10 sperm; XY1: 10 sperm, XY2: 10 sperm, XY3: 3 sperm, XY4: 2 sperm, XY5: negative control, XY6: positive control.

extent of mosaicism was above 30%. Chaotic embryos were defined as those showing a complex pattern of aneuploidies, involving more than six chromosomes. The NGS platform used herein has been validated in previous studies (Wells et al., 2014 and Kung et al., 2015) and is commercially available. Aside from the genetic outcome of the blastocyst, the sex of the embryo was also revealed.

WGA of sperm cells

A triplicate experiment was performed in which 2–60 sperm cells (Fig. 1) were collected in washing solution and tubed under the same conditions as the TE samples. Each experiment contained a positive control (TE sample of an abnormal embryo) and a negative control (blank collected after tubing the positive control) as well as a negative and positive control from Igenomix. An insemination dish with fertilisation medium was prepared and 10 000 progressive motile sperm were added per 25- $\mu$ l culture drop and cultured overnight as for a normal conventional IVF. On Day 1, the sperm cells were washed in Global Total medium and moved to a clean culture drop of Global Total medium. After 1 day of culture in Global Total medium, motile sperm cells were immobilised with an ICSI needle after which they were transferred with an ICSI needle to a dish with washing solution. The sperm was collected with a 300- $\mu$ l stripper (COOK) under an inverted microscope to ensure that indeed at least two sperm cells were tubed. By pipetting five times up and down in the washing solution, it was

ensured that all sperm cells were tubed; after tubing the stripper was cleaned under the inverted microscope to ascertain no sperm cells were left in the stripper. The WGA protocol, as used for the TE samples and described above, was applied, after which DNA concentrations were measured with Qubit. The threshold for TE samples was set at 40 ng/ $\mu$ l.

Statistical analysis

Continuous variables are presented as mean and standard deviation. Categorical variables are presented as number of observations and percentages. Percentages were analysed using GLIMMIX procedure to consider the random effect patient (since one patient could have different embryos). The containment method was used to determine the denominator degrees of freedom for tests of fixed effects. The estimation technique used was Residual PL. The response distribution chosen was Poisson and Beta with link function log and logit respectively. The model was retained until the convergence criterion (GCONV = 1E-8) was satisfied, and the estimated G matrix was positive definite. Comparisons were made using procedure PDIFF (t-test that is equivalent to the F-test) of SAS. Proc GLIMMIX was also chosen because of the capacity of handling unbalanced data. The random effect structure used for this model was variance components (VC), even though there is just one single random effect. Proc MIXED was used to analyse



**Table I Sperm characteristics.**

| Volume (ml)                           | 2.7 ± 1.2     |
|---------------------------------------|---------------|
| Before capacitation                   |               |
| Total concentration                   | 173.8 ± 138.1 |
| Concentration (× 10 <sup>6</sup> /ml) | 81.5 ± 60.7   |
| Motility (%)                          |               |
| A                                     | 37.0 ± 18.5   |
| B                                     | 19.7 ± 16.2   |
| C                                     | 5.6 ± 4.8     |
| After capacitation                    |               |
| Concentration (× 10 <sup>6</sup> /ml) | 2.7 ± 1.1     |
| Motility (%)                          |               |
| A                                     | 74.0 ± 21.2   |
| B                                     | 19.5 ± 20.2   |
| C                                     | 2.4 ± 1.7     |

Concentration and motility before and after capacitation. A: rapidly progressive, B: slowly progressive and C: non progressive. Results are expressed as average ± SD.

continuous variables. The same parameters were applied than for proc GLIMMIX.

Interactions were not considered as nested factors since they were not relevant for the model. Quality blastocysts was also analysed with Proc GLIMMIX using Poisson response distribution.

P values, odds ratios and confidence interval at 95% (OR [95% CI]) are presented in the summary tables, in association with the descriptive statistics. A P value of 0.05 (both sides) was considered statistically significant. All analyses were performed using SAS studio (SAS® Studio). There were no missing values for any of the collected variables that were analysed.

Results

Thirty patients were recruited for sibling oocyte randomisation in this study, with an average age of 30.3 ± 5.2 [22–39] years old, a BMI of 25.1 ± 3.3 [18.8–29.9] kg/m<sup>2</sup> and AMH levels of 4.2 ± 2.6 [0.85–11.68] ng/ml. Patients were stimulated for 11.5 ± 1.1 days with a total gonadotropin use of 2204.0 ± 640.6 IU. Fifteen patients were triggered with hCG, 10 with a Dual trigger and 5 with GnRHa. Half of the patients (53.3%) experienced primary infertility; the other half (46.7%) had secondary infertility. The major indication for PGT-A was recurrent abortion (47%), while less common indications were advanced maternal age and repeated implantation failure. Male partners were on average 33.2 ± 4.9 [23–44] years old; their abstinence duration ranged from 1 day up to 1 month. Sperm characteristics on day of OR are presented in Table I. The WGA experiment in which 2–30 sperm cells were collected showed that the WGA protocol was unable to amplify sperm DNA (Fig. 1). The highest Qubit value obtained for sperm DNA was 3.26 ng/μl, the negative control was 1.54 ng/μl, the positive control was 25.5 ng/μl and TE samples gave Qubit values above 46.4 ng/μl.

After OR, a total of 568 oocytes were obtained and half were randomly assigned to IVF and the other half to ICSI (9.4 ± 4.0 vs

9.5 ± 4.1; P = 0.645) (Table II). No significant difference was observed in the maturation and fertilisation rates. However, degeneration per cycle was higher after ICSI (0.1 ± 0.3 vs 0.7 ± 0.8; P = 0.0003) and abnormal fertilisation (≥3PN) was more frequently observed after IVF (0.9 ± 1.2 vs 0.2 ± 0.4; P = 0.005). On Day 3 of development, a higher number of EQ1 embryos was observed after ICSI, which was counterbalanced by a higher number of EQ2 embryos after IVF. Of the embryos undergoing extended culture to the blastocyst stage, no difference was observed in the blastulation rate on Day 5 between both insemination methods (8.4 vs 70.8%; P = 0.076; OR: 1.10062 [0.99364–1.21919]). Also, the proportion of good- and bad-quality blastocysts was not different between groups (P = 0.720). There was no difference in the number of blastocysts biopsied per cycle between IVF and ICSI (4.0 ± 2.8 vs 3.9 ± 2.5; P = 0.774), nor in the number of euploid blastocysts (2.0 ± 1.8 vs 1.9 ± 1.7; P = 0.808) (Table III); all biopsied blastocysts were informative. The average euploid rate per cycle was not different between conventional IVF and ICSI (49.8 vs 44.1%, P = 0.775; OR: 1.05664 [0.75188–1.48494]).

Total fertilisation failure was observed in the ICSI arm of one patient; two patients had no blastocysts biopsied from the ICSI arm, while three (10.0%) and six patients (20.0%) had no euploid blastocyst available from the IVF or ICSI arm, respectively (P = 0.472). When considering all IVF and ICSI sibling oocytes together, all patients had at least one euploid embryo available for frozen embryo transfer; the proportion of euploid blastocysts available per patient after IVF and ICSI, is depicted in Figure 2. Considering all euploid blastocysts, there was no difference in the distribution of male and female blastocysts between IVF and ICSI (61.0 vs 39.0%; 42.9 vs 57.1%; P = 0.063; Table IV).

Discussion

Sibling oocytes from couples with non-male factor infertility were subjected to conventional IVF and ICSI; no significant differences were found in the fertilisation rate, nor in developmental competence. A similar number of blastocysts were biopsied, and the euploid rate was also comparable between both groups.

Data on euploid rates between conventional IVF and ICSI are very limited. Two retrospective studies performed blastomere biopsy followed by PGT-M or FISH (Feldman et al., 2017; Şahin et al., 2018). Both studies were unable to detect differences in euploid rates between conventional IVF and ICSI (41.7 vs 35.2% and 35.0 vs 30.1%, respectively). However, no information on sperm concentration and motility was provided. Palmerola et al. (2019) retrospectively compared 75 IVF cycles to 227 ICSI cycles after TE biopsy and NGS and found no difference in euploid rate between the two insemination methods (27.9 vs 30.0%). However, patients for whom the oocytes were subjected to conventional IVF had significantly higher sperm concentration and motility, highlighting the different indications for the selected insemination method between both groups. We were also unable to find differences in the euploid rates between conventional IVF and ICSI (49.8 vs 44.1%). The higher euploid rates observed in our study may be explained by the inclusion of only couples with non-male factor infertility, the young maternal age (30.3 years) and the use of blastocyst biopsy as compared to cleavage stage biopsy (Feldman et al., 2017; Şahin et al., 2018).

**Table II** Preimplantation development between IVF and ICSI embryos.

| Number of cycles/patients                                | 30          |             |         |                           |
|----------------------------------------------------------|-------------|-------------|---------|---------------------------|
| Number of COCs retrieved (average ± SD)                  | 18.9 ± 8.1  |             |         |                           |
| Total number of COCs retrieved                           | 568         |             |         |                           |
|                                                          | IVF         | ICSI        | P value | OR [95%CI]                |
| Number of COCs assigned (average ± SD)                   | 9.4 ± 4.0   | 9.5 ± 4.1   | 0.645   |                           |
| Total number of COCs assigned (%)                        | 283 (49.8)  | 285 (50.2)  |         |                           |
| Number of mature oocytes (average ± SD)                  | 8.1 ± 3.7   | 7.8 ± 3.8   | 0.349   |                           |
| Total number of mature oocytes (%)                       | 86.7 ± 12.4 | 82.4 ± 14.4 | 0.274   | 1.2632 [0.84227–1.89471]  |
| Fertilization                                            |             |             |         |                           |
| Normal fertilisation (average ± SD)                      | 6.1 ± 3.8   | 6.3 ± 3.5   | 0.609   |                           |
| Total number of normally fertilised oocytes (%)          | 64.0 ± 21.3 | 65.4 ± 20.6 | 0.946   | 0.97825 [0.52147–1.83516] |
| Degeneration (average ± SD)                              | 0.1 ± 0.3   | 0.7 ± 0.8   | <0.001  |                           |
| Total number of degenerated oocytes (%)                  | 0.7 ± 2.8   | 7.7 ± 9.7   | <0.001  | 0.93299 [0.90001–0.96718] |
| ≥3PN (average ± SD)                                      | 0.9 ± 1.2   | 0.2 ± 0.4   | 0.005   |                           |
| Total number of abnormally (≥3PN) fertilised oocytes (%) | 10.4 ± 14.2 | 3.0 ± 6.1   | 0.062   | 2.07848 [1.18981–3.6309]  |
| Embryo quality on Day 3                                  |             |             |         |                           |
| EQ1 (average ± SD)                                       | 3.0 ± 2.8   | 4.1 ± 3.0   | 0.043   | 0.7459 [0.56856–0.97856]  |
| EQ2 (average ± SD)                                       | 1.5 ± 1.4   | 0.8 ± 0.9   | 0.032   | 1.76 [1.07726–2.87543]    |
| EQ3 (average ± SD)                                       | 0.8 ± 0.9   | 0.8 ± 1.2   | 0.887   | 1.04167 [0.59494–1.82383] |
| EQ4 (average ± SD)                                       | 0.8 ± 1.3   | 0.8 ± 1.6   | 0.885   | 0.95833 [0.54092–1.69784] |
| Total EQ1 (%)                                            | 92 (50.3)   | 122 (64.6)  | 0.023   |                           |
| Total EQ2 (%)                                            | 43 (24.0)   | 25 (13.2)   |         |                           |
| Total EQ3 (%)                                            | 25 (13.8)   | 24 (12.7)   |         |                           |
| Total EQ4 (%)                                            | 22 (12.1)   | 18 (9.5)    |         |                           |
| Blastocyst development on Day 5                          |             |             |         |                           |
| Embryos with extended culture (/2PN)                     | 168         | 176         |         |                           |
| Blastulating (%) ± SD)                                   | 80.4 ± 20.4 | 70.8 ± 31.4 | 0.076   | 1.10065 [0.99364–1.21919] |
| EQ1 (average ± SD)                                       | 1.3 ± 1.5   | 1.2 ± 1.6   | 0.732   | 1.08333 [0.68869–1.70412] |
| EQ2 (average ± SD)                                       | 2.4 ± 2.3   | 2.4 ± 1.8   | 0.869   | 0.97260 [0.70154–1.34840] |
| EQ3 (average ± SD)                                       | 0.7 ± 0.8   | 1.0 ± 1.4   | 0.278   | 0.73333 [0.42303–1.27125] |
| EQ4 (average ± SD)                                       | 1.2 ± 1.2   | 1.3 ± 1.4   | 0.650   | 0.9000 [0.57371–1.41187]  |
| Total EQ1 (%)                                            | 39 (23.5)   | 35 (20.0)   | 0.720   |                           |
| Total EQ2 (%)                                            | 69 (41.6)   | 73 (41.7)   |         |                           |
| Total EQ3 (%)                                            | 22 (13.3)   | 30 (17.1)   |         |                           |
| Total EQ4 (%)                                            | 36 (21.7)   | 37 (21.1)   |         |                           |

Number of oocytes assigned, maturation and fertilisation rate between IVF and ICSI. Results are expressed as average  $\pm$  SD per cycle ( $n = 30$ ) or  $\pm$  SD per cycle ( $n = 30$ ). Embryo quality on Day 3 and Day 5. COC: cumulus oocyte complex, PN: pronucleus, EQ: embryo quality, SD: standard deviation. Degrees of freedom: 1.

Genetic contamination of the TE samples from maternal cumulus cells and adherent sperm cells has been suggested as possible factors adversely affecting the accuracy of genetic test results (Harton et al., 2011; ASRM, 2012; Palmerola et al., 2019). Enzymatic removal of cumulus cells, combined with mechanical removal, is not always successful in removing all cumulus cells before ICSI, while mechanical pipetting of IVF oocytes prior to the fertilisation check allows a faster, easier and less invasive removal of all cumulus cells. When TE cells are already herniating at the time of biopsy, the biopsy will be performed away from the zona where potential sperm contamination may happen. In this study, the zona was opened at the time of the biopsy, and the

cells were taken with the flicking method. Even though this technique is prone to potential contamination, visual inspection of the TE pieces confirmed the complete absence of sperm. Moreover, it has recently been shown that sperm DNA fails to amplify under the conditions used for PGT-A on TE samples (Lynch et al., 2019). These results were also confirmed in this study, as no sperm DNA amplification was observed, even if 60 sperm cells were tubed. Although the immobilised motile sperm were collected on Day 1, the sperm attached to the zona at the time of biopsy are intact and not showing signs of degeneration. Therefore, amplification will also be absent on Day 5 of development, and we suggest that a different protocol should be applied to obtain

**Table III** Blastocyst biopsy and euploid blastocysts.

|                            | IVF             | ICSI            | P value | OR [95% CI]               |
|----------------------------|-----------------|-----------------|---------|---------------------------|
| <b>Blastocyst biopsy</b>   |                 |                 |         |                           |
| Day 5 (average $\pm$ SD)   | 2.7 $\pm$ 2.7   | 2.6 $\pm$ 2.1   | 0.941   |                           |
| Day 5 (%)                  | 60.1 $\pm$ 27.6 | 55.7 $\pm$ 35.5 | 0.244   | 0.77769 [0.51768–1.16827] |
| Day 6 (average $\pm$ SD)   | 1.3 $\pm$ 0.8   | 1.2 $\pm$ 1.2   | 0.758   |                           |
| Day 6 (%)                  | 37.4 $\pm$ 26.9 | 34.3 $\pm$ 32.2 | 0.846   | 1.08812 [0.46696–2.53556] |
| Day 7 (average $\pm$ SD)   | 0.07 $\pm$ 0.3  | 0.03 $\pm$ 0.2  | NA      |                           |
| Day 7 (%)                  | 2.5 $\pm$ 10.1  | 3.3 $\pm$ 18.3  | NA      | NA                        |
| Total (average $\pm$ SD)   | 4.0 $\pm$ 2.8   | 3.9 $\pm$ 2.5   | 0.774   |                           |
| Total (%)                  | 67.4 $\pm$ 22.1 | 60.6 $\pm$ 29.6 | 0.619   | 1.10702 [0.74608–1.64256] |
| <b>Euploid blastocysts</b> |                 |                 |         |                           |
| Day 5 (average $\pm$ SD)   | 1.4 $\pm$ 1.7   | 1.5 $\pm$ 1.4   | 0.923   |                           |
| Day 5 (%)                  | 65.9 $\pm$ 41.1 | 64.2 $\pm$ 42.2 | 0.2213  | 0.67798 [0.41340–1.11190] |
| Day 6 (average $\pm$ SD)   | 0.53 $\pm$ 0.7  | 0.4 $\pm$ 0.6   | 0.425   |                           |
| Day 6 (%)                  | 24.0 $\pm$ 35.4 | 15.8 $\pm$ 27.9 | 0.484   | 1.52163 [0.47714–4.85261] |
| Day 7 (average $\pm$ SD)   | 0.0 $\pm$ 0.0   | 0.0 $\pm$ 0.0   | NA      |                           |
| Day 7 (%)                  | 0 (0.0)         | 0 (0.0)         | NA      | NA                        |
| Total (average $\pm$ SD)   | 2.0 $\pm$ 1.8   | 1.9 $\pm$ 1.7   | 0.808   |                           |
| Total (%)                  | 49.8 $\pm$ 28.8 | 44.1 $\pm$ 34.6 | 0.755   | 1.05664 [0.75188–1.48494] |

Total number of blastocysts biopsied and euploid per day of biopsy (5, 6 or 7). Blastocyst biopsy expressed per normally fertilised oocytes; euploid blastocysts expressed per blastocyst biopsied. Results are expressed as average  $\pm$  SD per cycle ( $n = 30$ ) or %  $\pm$  SD per cycle ( $n = 30$ ). SD: standard deviation, NA: not applicable. Degrees of freedom: 1.

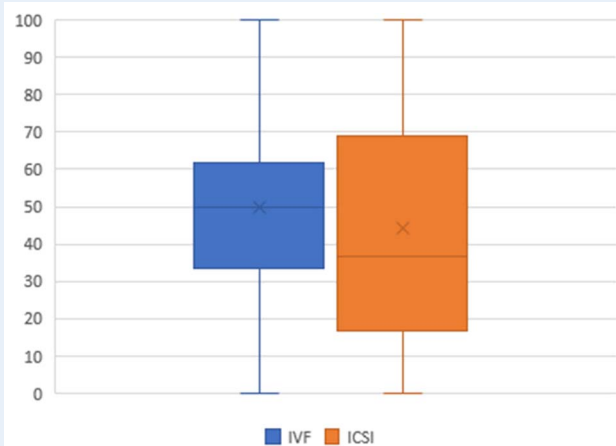**Figure 2** Euploid rate for conventional IVF and ICSI. Figure with average euploid rates for the 30 cycles, min–max, first and third quartiles.

sperm DNA amplification. For this reason, the initial assumptions to prevent contamination and defending the use of ICSI can be put aside; the results of this study reassure that conventional IVF can be safely applied for couples with non-male factor infertility or in cases in which oocyte quality is not amenable to ICSI.

As immature oocytes are not selected for ICSI, the maturation rate for ICSI oocytes is scrutinised on the day of OR. However, the maturation rate of IVF oocytes is only verified 16–18 h after the

**Table IV** Sex of euploid and aneuploid embryos.

|                  | IVF<br><i>n</i> (%) | ICSI<br><i>n</i> (%) |
|------------------|---------------------|----------------------|
| Biopsied         | 120                 | 116                  |
| Euploid          | 59 (49.2)           | 56 (48.3)            |
| XY               | 36                  | 24                   |
| XX               | 23                  | 32                   |
| Aneuploid        | 54 (45.0)           | 55 (47.4)            |
| XY               | 24                  | 26                   |
| XX               | 26                  | 23                   |
| X0               | 2                   | 3                    |
| XXY              | 2                   | 1                    |
| XXX              | /                   | 1                    |
| –Xq              | /                   | 1                    |
| Complex abnormal | 7 (5.8)             | 5 (4.3)              |

XY: male, XX: female, X0: lack of second sex chromosome, XXY: Klinefelter, XXX: trisomy X, –Xq: deletion on the long arm of chromosome X.

maturation rate for ICSI oocytes, as denudation is only performed on Day 1. As such, a higher maturation rate is expected in IVF siblings as they have the possibility to mature overnight. However, after assigning an equal number of COCs to each group ( $9.4 \pm 4.0$  vs  $9.5 \pm 4.1$ ), the maturation rates were not different between IVF ( $8.1 \pm 3.7$ ) and ICSI ( $7.8 \pm 3.8$ ). When analysing the fertilisation potential in our cohort of patients with non-male factor infertility, we were unable to detect any

significant difference between IVF and ICSI sibling oocytes in terms of normal fertilisation;  $6.1 \pm 3.8$  vs  $6.3 \pm 3.5$ . These results are in line with previous studies on couples with non-male factor infertility in which equal fertilisation rates were observed between both insemination methods on sibling oocytes (Ruiz et al., 1997; Staessen et al., 1999; Van Landuyt et al., 2005). However, Ming et al. (2015) observed higher fertilisation rates after IVF on sibling oocytes in couples with non-male factor infertility, while others have shown higher fertilisation rates after ICSI on sibling oocytes (Khamisi et al., 2001; Farhi et al., 2019). While sibling oocyte studies facilitate exclusion of maternal factors that may influence developmental competence, prospective randomised controlled trials, matched controlled trials and large retrospective studies in couples with non-male factor infertility have also shown equal fertilisation rates or fertilisation rates favouring IVF (Aboulghar et al., 1996; Hsu et al., 1999; Bhattacharya et al., 2001; Foong et al., 2006; Kim et al., 2007; Ou et al., 2010; Eftekhar et al., 2012; Tannus et al., 2017; Schwarze et al., 2017; Li et al., 2018; Sustar et al., 2019; Drakopoulos et al., 2019).

Fertilisation failure after conventional IVF is much lower in couples with non-male factor infertility (~10%) compared to couples with mild-male factor infertility (45%) (Aboulghar et al., 1996; Verheyen et al., 1999; Plachot et al., 2002; Tournaye et al., 2002; Kihale et al., 2003). A large retrospective study in Latin America, including almost 50 000 IVF or ICSI cycles in couples with non-male factor infertility, demonstrated a lower fertilisation failure rate after conventional IVF (3.37 vs 4.49%) (Schwarze et al., 2017), and this concurs with many other studies demonstrating equal or lower fertilisation failure rates after conventional IVF with normozoospermia (Kim et al., 2007; Tannus et al., 2017). However, some older studies have found a higher fertilisation failure after IVF (Ruiz et al., 1997; Staessen et al., 1999). The fact that some studies suggest that fertilisation rates are higher with IVF in circumstances of normozoospermia may be attributed to the fact that ICSI oocytes are more prone to degeneration due to mechanical damage, which is not the case for oocytes inseminated by IVF. This damage may be induced during the denudation process as well as during the ICSI procedure itself. The enzymatic and mechanical stress during the removal of cumulus cells may cause a high degree of spindle deviations prior to the ICSI procedure (Hewitson et al., 1999; Rienzi et al., 2003); these are generally not observed after IVF, which allows a gentle and fast removal of the cumulus cells on Day 1, especially if the oocyte is fertilised. During the ICSI procedure itself, mechanical damage to the oocyte may lead to degeneration, with operator variabilities ranging from 5 to 19% (Ebner et al., 2001). Indeed, the degeneration rate after ICSI was significantly higher in our pilot study ( $P = 0.0003$ ); however, this was counterbalanced by a higher abnormal fertilisation rate after IVF ( $P = 0.005$ ). Even though a progressively motile sperm concentration of  $0.33 \times 10^6$ /ml was used, which is within the advised ESHRE guidelines (2015) of  $0.1\text{--}0.5 \times 10^6$ /ml, the 9.5% abnormal fertilisation rate observed in this study is above the competency levels of the Vienna consensus (ESHRE Special Interest Group of Embryology and Alpha Scientists in Reproductive Medicine, 2016). Reducing the insemination concentration to the lower reference limit of  $0.1 \times 10^6$ /ml might be beneficial for the normal fertilisation rate and hence also for the blastocyst development after conventional IVF. While no further options are available after fertilisation failure in ICSI oocytes, a rescue-ICSI procedure can be applied on failed-fertilised IVF oocytes; not only will this technique increase the fertilisation rate for

the patient, they also moderately increase pregnancy rates (Morton et al., 1997; Yuzpe and Fluker, 2001). With different screening tests available and every stimulation cycle being different, no test will give a 100% guarantee to prevent fertilisation failure; not after conventional IVF and not after ICSI (Mahutte and Arici, 2003).

Since the introduction of ICSI to the present day, developmental competence has been extensively studied between conventional IVF and ICSI. Particularly, in couples with male factor infertility, negative selection during preimplantation development is attributed to the selection of abnormal sperm for ICSI which may result in abnormal cleavage and developmental arrest (Shoukir et al., 1998; De Vos et al., 2003). This paternal effect becomes more pronounced after embryonic genome activation around Day 3, which is translated in an increased developmental arrest to the blastocyst stage in ICSI embryos (Miller and Smith, 2001). In couples with non-male factor infertility, sperm velocity is sufficient for cumulus-zona penetration in IVF and rapidly progressive, morphologically normal sperm are selected for ICSI. This translates into equal or improved blastocyst formation following conventional IVF (Ruiz et al., 1997; Staessen et al., 1999; Khamisi et al., 2001; Jeziorowski et al., 2002; Van Landuyt et al., 2005; Ming et al., 2015; Tannus et al., 2017). Conventional IVF is an appropriate option for a young population with unexplained or tubal infertility with a normal response to ovarian stimulation. The same is also true of patients with an extremely low ovarian response and those of advanced maternal age (Ou et al., 2010; Sfountouris et al., 2015; Tannus et al., 2017; Schwarze et al., 2017; Guo et al., 2018; Liu et al., 2018; Farhi et al., 2019). These results are in keeping with the development observed in this study; no significant differences were observed in the number of blastulating embryos on Day 5 (80.4 vs 70.8%;  $P = 0.076$ ) and EQ on Day 5 ( $P = 0.720$ ). On completion of blastocyst culture, an equal number of blastocysts were biopsied in both the IVF and ICSI study groups ( $4.0 \pm 2.8$  vs  $3.9 \pm 2.5$ ;  $P = 0.774$ ).

While this is a pilot study with a limited study group, this is the first prospective trial to verify the euploid rate in IVF/ICSI sibling oocytes and demonstrates that IVF will not jeopardise a couple's cycle; the absence of euploid embryos was observed in 3/30 (10%) IVF and 6/30 (20%) ICSI cycles. Even though ICSI is popular to salvage fertilisation failure, this study experienced only one total fertilisation failure, in the ICSI arm of the study. Sperm morphology was not evaluated before insemination, which could be viewed as a potential bias. As the zona provides a barrier for abnormal sperm, this could only be beneficial for the IVF-inseminated oocytes. With the delivery of a healthy child being the endpoint of every cycle, the inclusion of only 30 cycles provides insufficient data to comment on pregnancy and live birth rates in this study. An ongoing RCT, by Vuong and colleagues, will soon provide data on the effectiveness of IVF and ICSI on live birth rates (NCT03428919) (Dang et al., 2018). As this patient population was on average 30.3 years old, the results cannot be generalised to an older IVF population, even though conventional IVF is highly efficient in patients with advanced maternal age and low ovarian reserve (Liu et al., 2018). In case a non-inferiority trial would be performed based on the outcomes described in this study, a total of 426 blastocysts need to be biopsied in both arms to prove that the euploid rate is equal between conventional IVF and ICSI. A final important consideration is that IVF incurs a significant reduction in cost as compared to ICSI and is a less complex technique for embryologists.



To conclude, this is the first prospective trial comparing the developmental competence and ploidy outcome in patients with non-male factor infertility following conventional IVF and ICSI on sibling oocytes. No significant difference was identified in fertilisation rates, embryo development and number of euploid embryos resulting from either conventional IVF or ICSI. In cases of non-male factor infertility, there is no indication to perform ICSI for all oocytes.

## Acknowledgements

We would like to thank Leyla Depret Bixio for her help with running statistical analysis and statistical interpretation and Dr Carol Coughlan for linguistic support.

## Authors' roles

N.D.: conception and design of the study; N.D., I.E., A.A., A.D., A.B., A.Ar., L.M., B.L., H.F.: oocyte retrieval; N.D., I.E., A.A., A.D., A.B., A.Ar.: IVF and ICSI procedure and embryo evaluations; N.D., I.E., A.A., A.D., A.B., A.Ar.: blastocyst biopsy and tubing; N.D.: construction of the database and data interpretation; N.D.: drafting the manuscript; N.D., I.E., A.A., A.D., A.B., A.Ar., L.M., B.L., H.F.: critical review and final approval of the manuscript.

## Funding

No funding was obtained for this study.

## Conflict of Interest

There are no conflicts to declare.

## References

- Aboulghar M, Mansour R, Serour G, Sattar M, Amin Y. Intracytoplasmic sperm injection and conventional in vitro fertilization for sibling oocytes in cases of unexplained infertility and borderline semen. *Clinical Assist Reprod* 1996;**13**:38–42.
- Berger VK, Baker VL. Preimplantation diagnosis for single gene disorders. *Semin Reprod Med* 2014;**32**:107–113.
- Bhattacharaya S, Hamilton MP, Shaaban M, Khalaf Y, Seddler M, Ghobara T, Braude P, Kennedy R, Rutherford A, Hartshorne G et al. Conventional in-vitro fertilization versus intracytoplasmic sperm injection for the treatment of non-male factor infertility: a randomized controlled trial. *Lancet* 2001;**357**:2075–2079.
- Bianchi PG, Manicardi GC, Urner F, Campana A, Sakkas D. Chromatin packaging and morphology in ejaculated human spermatozoa: evidence of hidden anomalies in normal spermatozoa. *Mol Hum Reprod* 1996;**2**:139–144.
- Boulet SL, Mehta A, Kissin DM, Warner L, Kawwass JF, Jamieson DJ. Trends in use and reproductive outcomes associated with intracytoplasmic sperm injection. *JAMA* 2015;**313**:255–263.
- Chambers GM, Paul RC, Harris K, Fitzgerald O, Boothroyd CV, Rombauts L, Chapman MG, Jorm L. Assisted reproductive technology in Australia and New Zealand: cumulative live birth rates as measures of success. *Med J Aust* 2017;**207**:114–118.
- Check JH, Bollendorf A, Summers-Chase D, Horwath D, Hourani W. Conventional oocyte insemination may result in better pregnancy outcome than intracytoplasmic sperm injection (ICSI) for unexplained infertility. *Clin Exp Obstet Gynecol* 2009;**36**:150–151.
- Check JH, Yuan W, Garberi-Levito MC, Swenson K, McMonagle K. Effect of method of oocyte fertilization on fertilization, pregnancy and implantation rates in women with unexplained infertility. *Clin Exp Obstet Gynecol* 2011;**38**:203–205.
- Dang VQ, Vuong LN, Ho TM, Ha AN, Nguyen QN, Truong BT, Pham QT, Want R, Norman RJ, Mol BW. The effectiveness of ICSI versus conventional IVF in couples with non-male factor infertility: a study protocol for a randomized controlled trial. *Hum Reprod Open* 2018;**2019**: hoz006.
- De Munck N, Santos-Ribeiro S, Mateizel I, Verheyen G. Reduced blastocyst formation in reduced culture volume. *J Assist Reprod Genet* 2015;**32**:1365–1370.
- De Vos A, Van de Velde H, Joris H, Verheyen G, Devroey P, Van Steirteghem A. Influence of individual sperm morphology on fertilization, embryo morphology, and pregnancy outcome of intracytoplasmic sperm injection. *Fertil Steril* 2003;**79**:42–48.
- Drakopoulos P, Garcia-Velasco J, Bosch E, Blockeel C, de Vos M, Santos-Ribeiro S, Makrigiannakis A, Tournaye H, Polyzos NP. ICSI does not offer any benefit over conventional IVF across different ovarian response categories in non-male factor infertility: a European multicenter analysis. *J Assist Reprod Genet* 2019. doi: [10.1007/s10815-019-01563-1](https://doi.org/10.1007/s10815-019-01563-1).
- Ebner T, Yaman C, Moser M, Sommergruber M, Jesacher K, Tews G. A prospective study on oocyte survival rate after ICSI: influence of injection technique and morphological features. *J Assist Reprod Genet* 2001;**18**:623–628.
- Eftekhari M, Mohammadian F, Tousefnejad F, Molaei B, Aflatoonian A. Comparison of conventional IVF versus ICSI in non-male factor infertility. *Iran J Reprod Med* 2012;**10**:131–136.
- European IVF-Monitoring Consortium (EIM), European Society of Human Reproduction and Embryology (ESHRE), Kupka MS, D'Hooghe T, Ferraretti AP, de Mouzon J, Erb K, Castilla JA, Calhaz-Jorge C, Ch DG, Goossens V. Assisted reproductive technology in Europe, 2011: results generated from European registers by ESHRE. *Hum Reprod* 2016;**31**:233–248.
- ESHRE Capri workshop group. Intracytoplasmic sperm injection (ICSI) in 2006: evidence and evolution. *Hum Reprod Update* 2007;**13**:515–526.
- ESHRE Guideline Group on good practice in IVF labs. Revised guidelines for good practice in IVF laboratories. 2015.
- ESHRE Special Interest Group of Embryology and Alpha Scientists in Reproductive Medicine. The Vienna consensus: report of an expert meeting on the development of ART laboratory performance indicators. *Reprod Biomed Online* 2016;**35**:494–510.
- Farhi J, Cohen K, Mizrahi Y, Weissman A, Raziel A, Orvieto R. Should ICSI be implemented during IVF to all advanced-age patients with non-male factor subfertility? *Reprod Biol Endocrinol* 2019;**17**:30.
- Feldman B, Aizer A, Brengauz M, Dotan K, Levron J, Schiff E, Orvieto R. Pre-implantation genetic diagnosis-should we use ICSI for all? *J Assist Reprod Genet* 2017;**34**:1179–1183.

- Foong SC, Fleetham JA, O'Keane JA, Scott SG, Tough SZ, Greene CA. A prospective randomized trial of conventional in vitro fertilization versus intracytoplasmic sperm injection in unexplained infertility. *J Assist Reprod Genet* 2006;**23**:137–140.
- Gardner DK, Schoolcraft WB. In-vitro culture of human blastocysts. In: Jansen R, Mortimer D (eds). *Towards reproductive certainty: fertility and genetics beyond 1999*. Carnforth: Parthenon Press, 1999,378–388.
- Grimstad FW, Nangia AK, Luke B, Stern JE, Mak W. Use of ICSI in IVF cycles in woman with tubal ligation does not improve pregnancy or live birth rates. *Hum Reprod* 2016;**1**–6.
- Guo N, Hua X, Li YF, Jin L. Role of ICSI in non-male factor cycles as the number of oocytes retrieved decreases from four to one. *Curr Med Sci* 2018;**38**:131–136.
- Harton GL, Magli MC, Lundin K, Montag M, Lemmen J. ESHRE PGD consortium/embryology special interest group-best practice guidelines for polar body and embryo biopsy for preimplantation genetic diagnosis/screening (PGD/PGS). *Hum Reprod* 2011;**26**:41–46.
- Hewitson L, Dominiko T, Takahashi D, Martinovich C, Ramalho-Santos J, Sutovsky P, Fant J, Jacob D, Monteith D, Neuringer M et al. Unique checkpoints during the first cell cycle of fertilization after cytoplasmic sperm injection in rhesus monkeys. *Nat Med* 1999;**5**:431–433.
- Hsu M, Mayer J, Aronshon M, Lanzendorf S, Muasher S, Kolm P, Oehninger S. Embryo implantation in in vitro fertilization and intracytoplasmic sperm injection: impact of cleavage status, morphology grade, and number of embryos transferred. *Fertil Steril* 1999;**72**:679–685.
- Jeziorowski T, Wech I, Wech N, Vanderzwalmen P. Embryo development after ICSI and after standard IVF in sibling oocytes from non-male factor infertility patients-a comparison. In: *Abstracts of the 18<sup>th</sup> Annual Meeting of the European Society of Human Reproduction and Embryology*, Vol. 44. Vienna, Austria, 2002.
- Kim HH, Bundorf MK, Behr B, McCallum SW. Use and outcome of intracytoplasmic sperm injection for non-male factor infertility. *Fertil Steril* 2007;**88**:622–628.
- Khamsi F, Yavas Y, Roberge S, Wong J, Lacanna I, Endman M. Intracytoplasmic sperm injection increased fertilization and good-quality embryo formation in patients with non-male factor indications for in vitro fertilization: a prospective randomized study. *Fertil Steril* 2001;**75**:342–347.
- Kihaile P, Misumi J, Hirotsuru K, Kumasako Y, Kisanga RE, Utsunomiya T. Comparison of sibling oocyte outcomes after intracytoplasmic sperm injection and in vitro fertilization in severe teratozoospermic patients in the first cycle. *Int J of Androl* 2003;**26**:57–62.
- Kung A, Munné S, Bankowski B, Coates A, Wells D. Validation of next-generation sequencing for comprehensive chromosome screening of embryos. *Reprod Biomed Online* 2015;**31**:760–769.
- Kupka MS, Ferraretti AP, de Mouzon J, Erb K, D'Hooghe T, Castilla JA, Calhaz-Jorge C, De Geyter C, Goossens V. European IVF-Monitoring Consortium, for the European Society of Human Reproduction and Embryology. Assisted reproductive technology in Europe, 2010: results generated from European registers by ESHRE. *Hum Reprod* 2014;**29**:2099–2113.
- La Marca A, Sunkara S. Individualization of controlled ovarian stimulation in IVF using ovarian reserve markers: from theory to practice. *Hum Reprod Update* 2014;**20**:124–140.
- Li Z, Wang AY, Bowman M, Hammarberg K, Farquhar C, Johnson L, Safi N, Sullivan EA. ICSI does not increase the cumulative live birth rate in non-male factor infertility. *Hum Reprod* 2018;**33**:1322–1330.
- Liu H, Zhao H, Yu G, Li M, Ma S, Zhang H, Wu K. Conventional in vitro fertilization (IVF) or intracytoplasmic sperm injection (ICSI): which is preferred for advanced age patients with five or fewer oocytes retrieved? *Arch Gynecol Obstet* 2018;**297**:1301–1306.
- Lynch C, Cater E, Charitou M, Forbes H, Griffin D, Gordon T. Intracytoplasmic sperm injection is not necessary as a preventive measure against paternal cell contamination in preimplantation genetic testing. 2019; PGDIS-OC16.
- Mahutte NG, Arici A. Failed fertilization: is it predictable? *Curr Opin Obstet Gynecol* 2003;**15**:211–208.
- Ming L, Yuan C, Ping L, Jie Q. Conventional in vitro fertilization maybe yields more available embryos than intracytoplasmic sperm injection for patients with no indications for ICSI. *Int J Clin Exp Med* 2015;**8**:21593–21598.
- Miller J, Smith T. The effect of intracytoplasmic sperm injection and semen parameters on blastocyst development in vitro. *Hum Reprod* 2001;**16**:918–924.
- Morton P, Yodres C, Tucker M, Wright G, Brockman W, Kort H. Reinsemination by intracytoplasmic sperm injection of day-1-old oocytes after complete conventional fertilization failure. *Fertil Steril* 1997;**68**:488–491.
- Ord T, Patrizio P, Balmaceda JP, Asch RH. Can severe male factor infertility be treated without micromanipulation? *Fertil Steril* 1993;**60**:110–115.
- Oehningen S, Kruger TF, Simon T, Jones D, Mayer J, Lanzendorf S, Toner JP, Muasher SJ. A comparative analysis of embryo implantation potential in patients undergoing in-vitro fertilization with a high insemination concentration or intracytoplasmic sperm injection. *Hum Reprod* 1996;**11**:106–1089.
- Ou YC, Lan KC, Huang FJ, Kung FT, Lan TH, Chang SY. Comparison of in vitro fertilization versus intracytoplasmic sperm injection in extremely low oocyte retrieval cycles. *Fertil Steril* 2010;**93**:96–100.
- Palermo G, Joris H, Devroey P, Van Steirteghem AC. Pregnancies after intracytoplasmic sperm injection of single spermatozoon into an oocyte. *Lancet* 1992;**340**:17–18.
- Palmerola KL, Vitez SF, Amrane S, Fischer CP, Forman EJ. Minimizing mosaicism: assessing the impact of fertilization method on rate of mosaicism after next-generation sequencing (NGS) preimplantation genetic testing for aneuploidy (PGT-A). *J Assist Reprod Genet* 2019;**36**:153–157.
- Patrizio P. Intracytoplasmic sperm injection (ICSI): potential genetic concerns. *Hum Reprod* 1995;**10**:2520–2523.
- Plachot M, Belaisch-Allart J, Mayenga JM, Chouraqui A, Tesquir L, Serkine AM. Outcome of conventional IVF and ICSI on sibling oocytes in mild male factor infertility. *Hum Reprod* 2002;**17**:362–369.
- Practice Committees of the American Society for Reproductive Medicine, Society for Assisted Reproductive Technology. Intracytoplasmic sperm injection (ICSI) for non-male factor infertility: a committee opinion. *Fertil Steril* 2012;**98**:1395–1399.
- Rienzi L, Ubaldi F, Martinez F, Iacobelli M, Minasi MG, Ferrero S, Tesarik J, Greco E. Relationship between meiotic spindle location with regard to the polar body position and oocyte developmental potential after ICSI. *Hum Reprod* 2003;**18**:1289–1293.

- Ruiz A, Remohi J, Minguez Y, Guanes P, Simon C, Pellicer A. The role of in vitro fertilization and intracytoplasmic sperm injection in couples with unexplained infertility after failed intrauterine insemination. *Fertil Steril* 1997;**68**:171–173.
- Şahin L, Bozkurt M, Şahin H, Gürel A, Caliskan E. To compare aneuploidy rates between ICSI and IVF cases. *Niger J Clin Pract* 2018;**20**:652–658.
- Staessen C, Camus M, Clasen K, De Vos A, Van Steirteghem A. Conventional in-vitro fertilization versus intracytoplasmic sperm injection in sibling oocytes from couples with tubal infertility and normozoospermic semen. *Hum Reprod* 1999;**14**:2474–2479.
- Schwarze J, Jeria R, Crosby J, Villa S, Ortega C, Pommer R. Is there a reason to perform ICSI in the absence of male factor? Lessons from the Latin American Registry of ART. *Hum Reprod Open* 2017;p1–p5.
- Sfontouris IA, Kolibianakis EM, Lainas GT, Navaratnarajah R, Tarlatzis BC, Lainas TG. Live birth rates using conventional in vitro fertilization compared to intracytoplasmic sperm injection in Bologna poor responders with a single oocyte retrieved. *J Assist Reprod Genet* 2015;**32**:691–697.
- Shoukir Y, Chardonens D, Campana A, Sakkas D. Blastocyst development from supernumerary embryos after intracytoplasmic sperm injection: a paternal influence? *Hum Reprod* 1998;**13**:1632–1637.
- Sustar K, Rozen G, Agresta F, Polyakov A. Use of intracytoplasmic sperm injection (ICSI) in normospermic men may result in lower clinical pregnancy and live birth rates. *Aust N Z J Obstet Gynaecol* 2019;1–6.
- Tannus S, Son WY, Gilman A, Younes G, Shavit T, Sahan MH. The role of intracytoplasmic sperm injection in non-male factor infertility in advanced maternal age. *Hum Reprod* 2017;**32**:119–124.
- Thornhill AR, deDie-Smulders CE, Geraedts JP, Harper JC, Harton GL et al. ESHRE PGD Consortium best practice guidelines for clinical preimplantation genetic diagnosis (PGD) and preimplantation genetic screening (PGS). *Hum Reprod* 2006;**20**:35–48.
- Tournaye H, Verheyen G, Albano C, Camus M, Van Landuyt L, Devroey P, Van Steirteghem A. Intracytoplasmic sperm injection versus in vitro fertilization: a randomized controlled trial and meta-analysis of the literature. *Fertil Steril* 2002;**78**:1030–1037.
- Van Landuyt L, De Vos A, Joris H, Verheyen G, Devroey P, Van Steirteghem A. Blastocyst formation in in vitro fertilization versus intracytoplasmic sperm injection cycles: influence of the fertilization procedure. *Fertil Steril* 2005;**83**:1397–1403.
- Verheyen G, Tournaye H, Staessen C, De Vos A, Vandervorst M, Van Steirteghem A. Controlled comparison of conventional in-vitro fertilization and intracytoplasmic sperm injection in patients with asthenozoospermia. *Hum Reprod* 1999;**14**:2313–2319.
- Watanabe H. Risk of chromosomal aberration in spermatozoa during intracytoplasmic sperm injection. *J Reprod Dev* 2018;**64**:371–376.
- Wells D, Kaur K, Grifo J, Glassner M, Taylor JC, Fragouli E, Munne S. Clinical utilisation of a rapid low-pass whole genome sequencing technique for the diagnosis of aneuploidy in human embryos prior to implantation. *J Med Genet* 2014;**51**:553–562.
- World Health Organization, Department of Reproductive Health and Research. *WHO laboratory manual for the examination and processing of human semen*, 5th edn. Switzerland: WHO Press, 2010.
- Yuzpe AA, Fluker MR. Rescue intracytoplasmic sperm injection (ICSI)-salvaging in vitro fertilization (IVF) cycles after total or near-total fertilization failure. *Fertil Steril* 2001;**73**:1115–1119.
